# Supplementary material for: Liquid–liquid and gas–liquid dispersions in electrochemistry: concepts, applications and perspectives
Source: Royal Society of Chemistry journal article supplement (doi:10.1039/d3cs00535f), 2024-01-01
Supplement: d3cs00535f1.pdf [file d3cs00535f1.pdf]

## Electronic Supporting Information

### Liquid-Liquid and Gas-Liquid Dispersions in Electrochemistry: Concepts, Applications and Perspectives

Kang Wang,<sup>a</sup> Yucheng Wang<sup>a</sup> and Marc Pera-Titus<sup>a\*</sup>

<sup>a</sup> Cardiff Catalysis Institute, School of Chemistry, Main Building, Cardiff University, Park Place, Cardiff CF10 3AT, UK

\*Corresponding author: [peratitusm@cardiff.ac.uk](mailto:peratitusm@cardiff.ac.uk)

---

#### FIGURE CAPTIONS

**Fig S1.** Schematic diagrams of (a) autoclave and glass cell (one-compartment). (b) H-type cell (two-compartment).

**Fig S2.** *i*/E curves for O<sub>2</sub> reduction. Supporting electrolyte: (a) without (c) with CMC of A336; (b and d) expanded voltammograms. Supporting electrolyte: O<sub>2</sub> saturated 0.1 mol L<sup>-1</sup> K<sub>2</sub>SO<sub>4</sub>.<sup>S1</sup> Figures a-d adapted from reference<sup>S1</sup> with permission from Elsevier, copyright 2007. Angular velocity of electrode rotation  $\omega_{1/2}$  vs. current plot of (e) PF-decalin/PF-tributylamine, 0.1 m NaOH. (f) PF-methyldecalin, 0.1 m NaOH.<sup>S2</sup> Images adapted with permission from Elsevier. Figures e-f adapted from reference<sup>S2</sup> with permission from Elsevier, copyright 2000.

**Fig S3.** List of saturated alcohols obtained by ECH of limonene and carvone on a Raney Nickel electrode in aqueous micellar and emulsified solutions stabilised by different surfactants.<sup>S3</sup>

**Fig S4.** FDCA yield (blue), HMF conversion (red) and cell voltage (orange) as a function of (a) organic/water volume ratio of the biphasic model electrolyte, and (b) the influence of current density at 1:2 organic/water volume ratio at a flow rate of 500 mL min<sup>-1</sup>.<sup>S4</sup>

**Fig S5.** CV plots of (a) 10 mM of chloroacetonitrile (CAN) and (b) 9-bromoanthracene (9-BAN). Nomenclature: Red, 12 mM [DDMIM][Cl] with supporting electrolyte 0.1 M phosphate buffer pH 7; Black, 12 mM [DDMIM][Cl] with supporting electrolyte 0.1 M phosphate buffer pH 7; and blue, 0.1 M phosphate buffer pH 7. Insert in (a): DMF with 0.1 M TBAP as supporting electrolyte. The electrolytic solutions were continuously fed with a stream of CO<sub>2</sub>.<sup>S5</sup> Images adapted from reference<sup>S5</sup> with permission from RSC, copyright 2021.

**Fig S6.** (a) Voltammograms of 1.2 mM Ru(NH<sub>3</sub>)<sub>6</sub><sup>3+</sup> reduction in 0.1 M KCl solution. Curves: **a**, silent conditions; **b**, 110 W cm<sup>-2</sup> ultrasound; and **c**, 190 W cm<sup>-2</sup> ultrasound. (b) Yield of decane vs. charge plot. Reaction conditions: 15 mmol of hexanoic acid in 1.0 M NaOH, 190 W cm<sup>-2</sup> of 20 kHz ultrasound, 7 mm electrode to horn distance, 0.18 A cm<sup>-2</sup> current density at a 12 mm diameter Pt disc electrode.<sup>S6</sup> Images adapted from reference<sup>S6</sup> with permission from Elsevier, copyright 2001.

**Fig S7.** (a) CV plots of 72 mM MEPBr + 0.5 M K<sub>2</sub>SO<sub>4</sub> at pH 5.1 (red line) and 72 mM KBr + 0.5 M K<sub>2</sub>SO<sub>4</sub> solution at pH 5.1 (black line). (b) CA plots for a Pt UME showing the droplets' collision time with the electrode.<sup>S7</sup> Images adapted from reference<sup>S7</sup> with permission from Elsevier, copyright 2017.

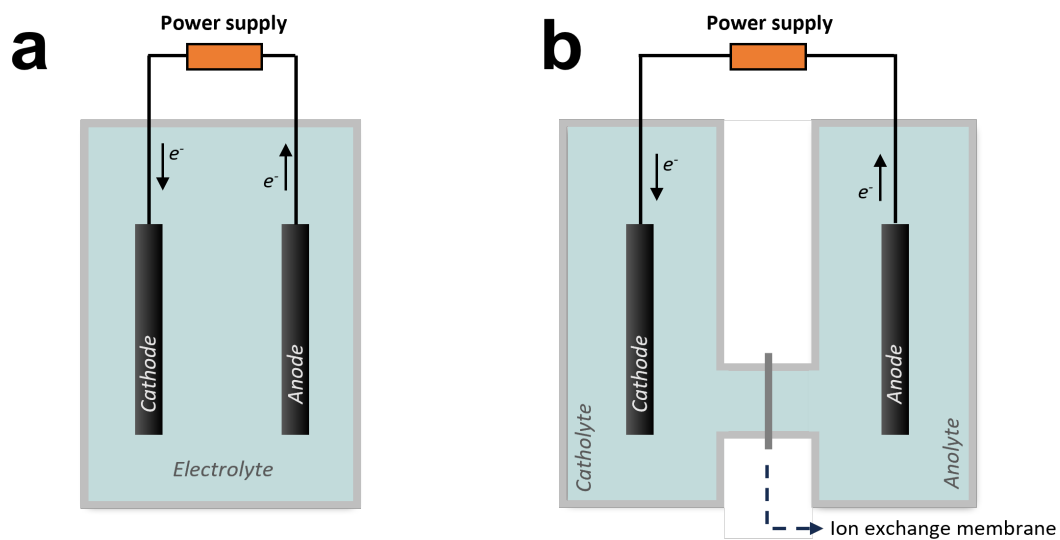

**Fig S1.** Schematic diagrams of (a) autoclave and glass cell (one-compartment). (b) H-type cell (two-compartment).

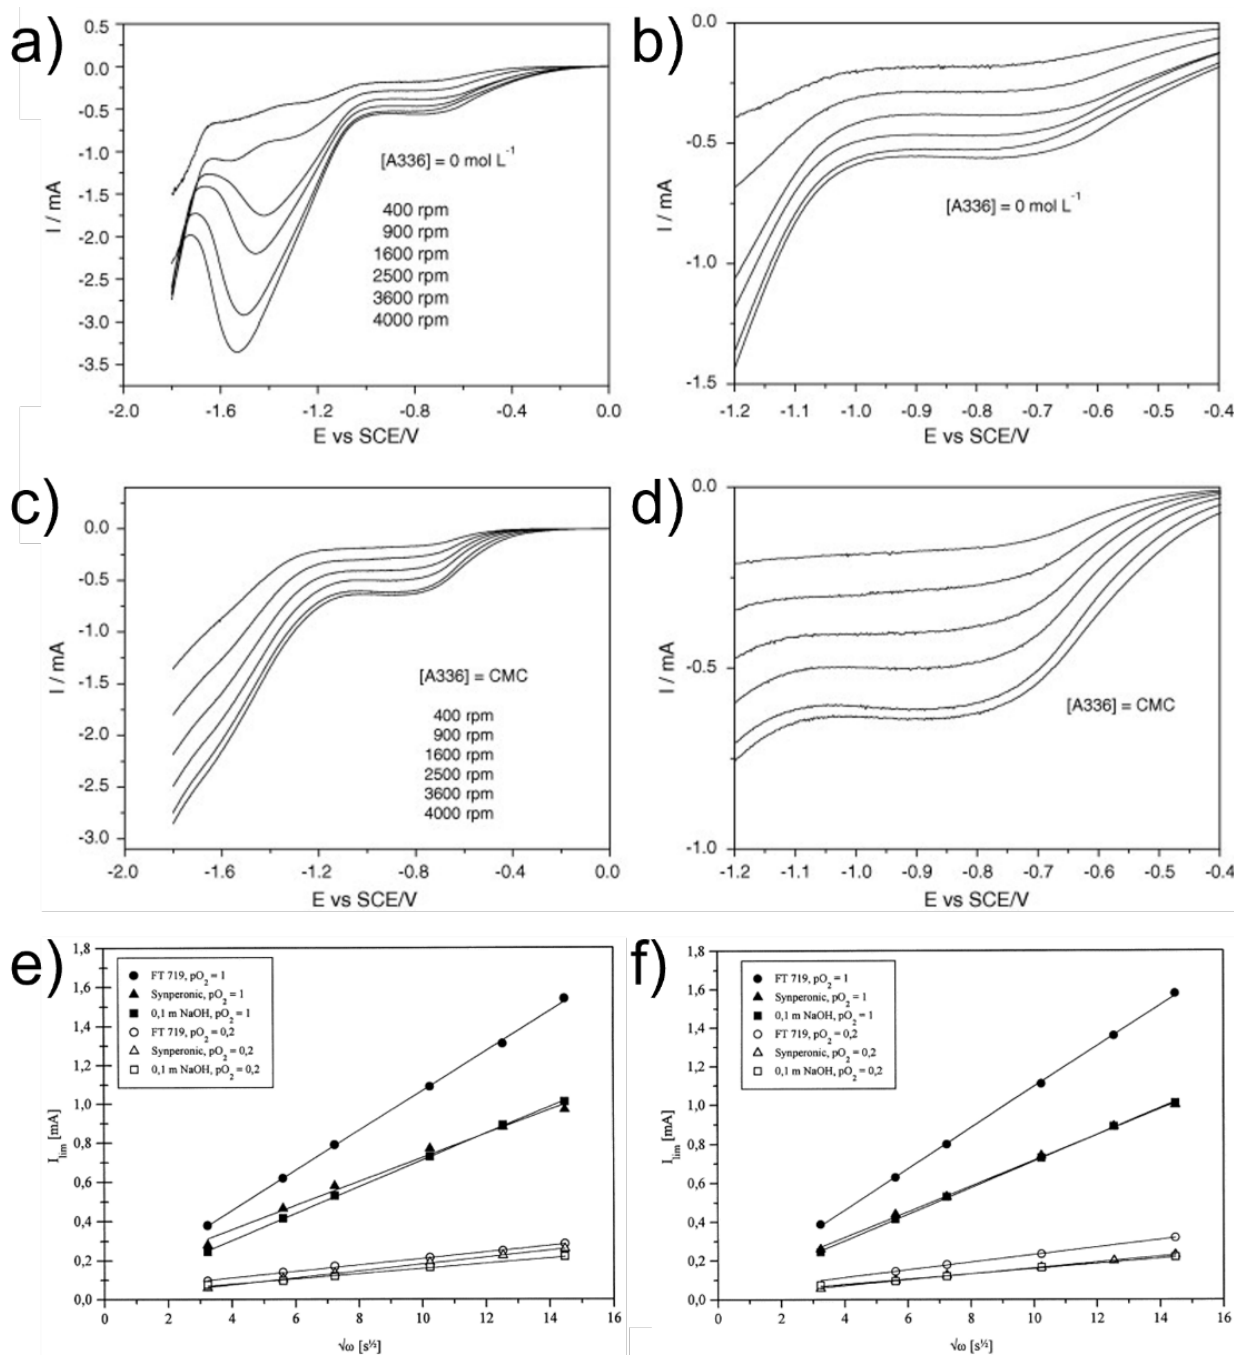

**Fig S2.**  $i/E$  curves for O<sub>2</sub> reduction. Supporting electrolyte: (a) without (c) with CMC of A336; (b and d) expanded voltammograms. Supporting electrolyte: O<sub>2</sub> saturated 0.1 mol L<sup>-1</sup> K<sub>2</sub>SO<sub>4</sub>.<sup>S1</sup> Figures a-d adapted from reference <sup>S1</sup> with permission from Elsevier, copyright 2007. Angular velocity of electrode rotation  $\omega_{1/2}$  vs. current plot of (e) PF-decalin/PF-tributylamine, 0.1 m NaOH. (f) PF-methyldecalin, 0.1 m NaOH.<sup>S2</sup> Images adapted with permission from Elsevier. Figures e-f adapted from reference <sup>S2</sup> with permission from Elsevier, copyright 2000.

In **Fig S2a&b**, the second reduction peak (-1.4 V to -1.6 V) indicate A336 inhibits H<sub>2</sub>O<sub>2</sub> reduction to H<sub>2</sub>O. Meanwhile, the half-wave potential shifts to more negative potentials in the presence of A336, which means A336 affects the thermodynamic properties of ORR. In **Fig S2e&f**, the presence of FT 719 enhances the current due to a more favoured O<sub>2</sub> transfer from the organic phase to the electrode surface using a fluorinated surfactant.

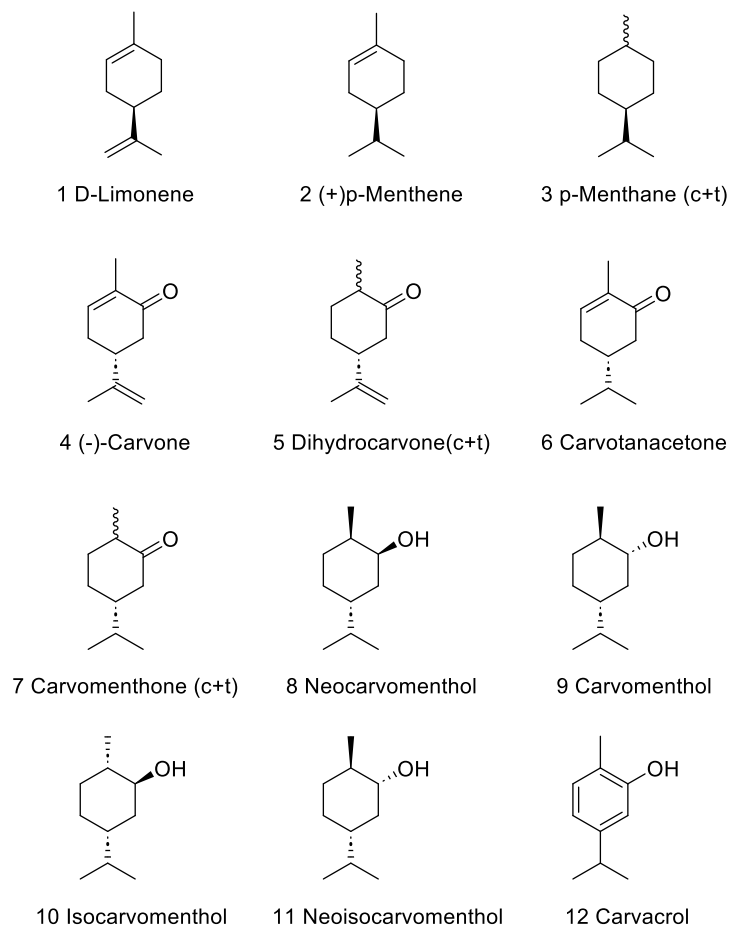

**Fig S3.** List of saturated alcohols obtained by ECH of limonene and carvone on a Raney Nickel electrode in aqueous micellar and emulsified solutions stabilised by different surfactants.<sup>S3</sup>

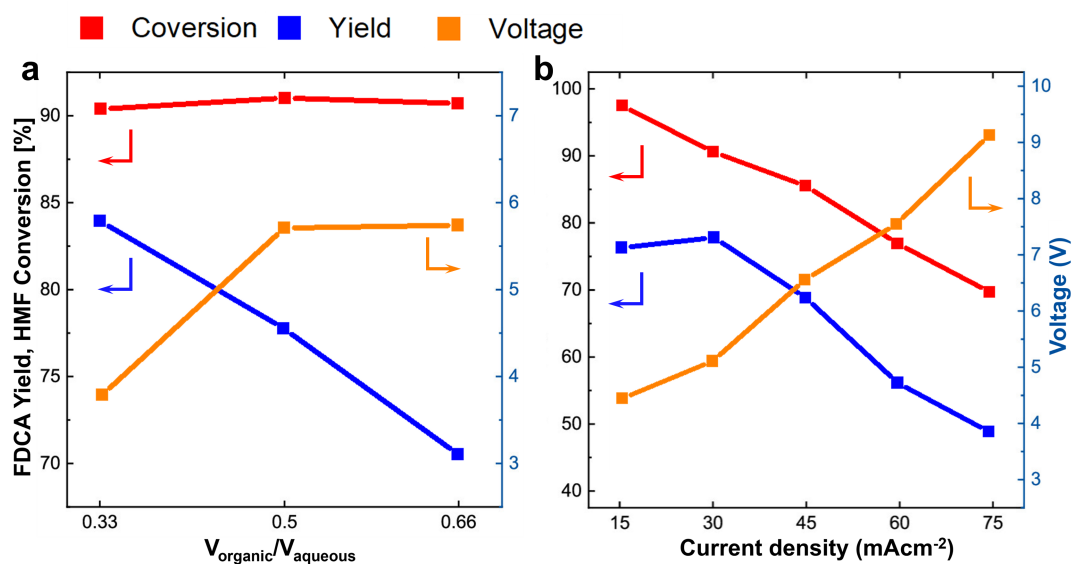

**Fig S4.** FDCA yield (blue), HMF conversion (red) and cell voltage (orange) as a function of (a) organic/water volume ratio of the biphasic model electrolyte, and (b) the influence of current density at 1:2 organic/water volume ratio at a flow rate of  $500 \text{ mL min}^{-1}$ .<sup>S4</sup>

The results show a high FDCA yield by feeding a HMF-rich organic phase to the electrode, while HMF was extracted into the aqueous phase and oxidized to FDCA.

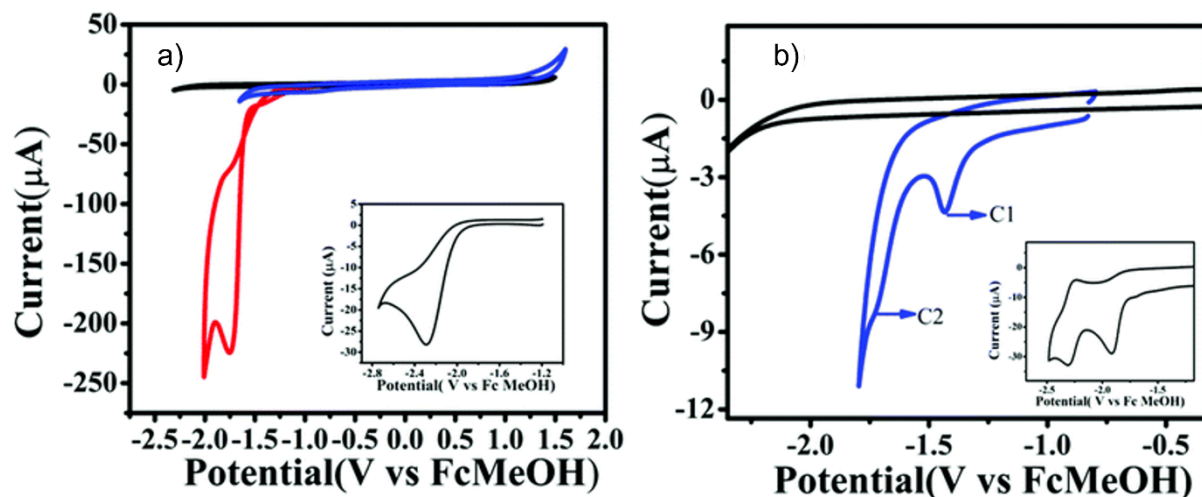

**Fig S5.** CV plots of (a) 10 mM of chloroacetonitrile (CAN) and (b) 9-bromoanthracene (9-BAN). Nomenclature: Red, 12 mM [DDMIM][Cl] with supporting electrolyte 0.1 M phosphate buffer pH 7; Black, 12 mM [DDMIM][Cl] with supporting electrolyte 0.1 M phosphate buffer pH 7; and blue, 0.1 M phosphate buffer pH 7. Insert in (a): DMF with 0.1 M TBAP as supporting electrolyte. The electrolytic solutions were continuously fed with a stream of CO<sub>2</sub>.<sup>S5</sup> Images adapted from reference <sup>S5</sup> with permission from RSC, copyright 2021.

Compared to the CV plots reported for CAN and 9-BAN at similar conditions without SAIL micelles, the reduction peaks appear at lower overpotential due to an enhanced mass transfer.

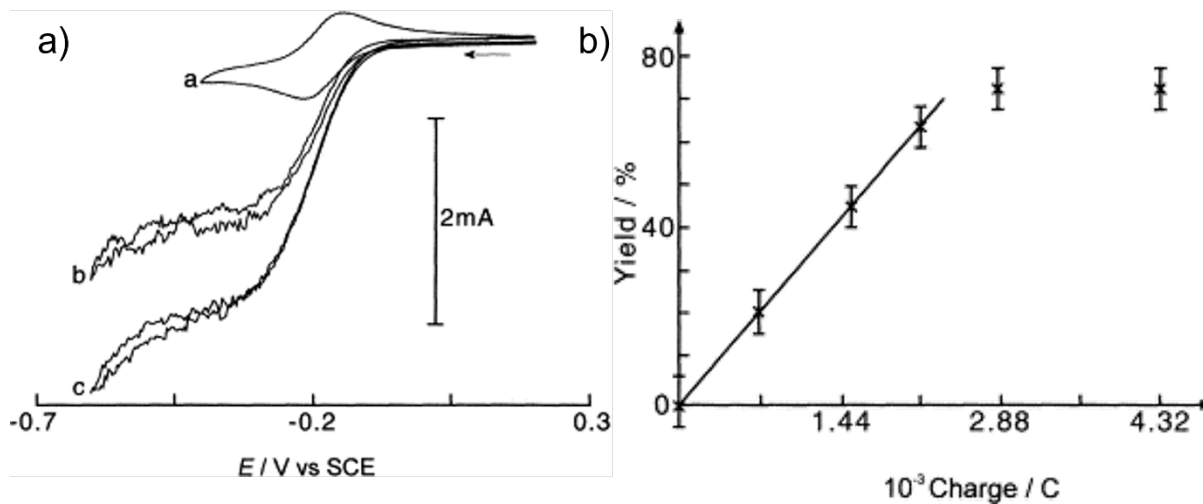

**Fig S6.** (a) Voltammograms of 1.2 mM Ru(NH<sub>3</sub>)<sub>6</sub><sup>3+</sup> reduction in 0.1 M KCl solution. Curves: **a**, silent conditions; **b**, 110 W cm<sup>-2</sup> ultrasound; and **c**, 190 W cm<sup>-2</sup> ultrasound. (b) Yield of decane vs. charge plot. Reaction conditions: 15 mmol of hexanoic acid in 1.0 M NaOH, 190 W cm<sup>-2</sup> of 20 kHz ultrasound, 7 mm electrode to horn distance, 0.18 A cm<sup>-2</sup> current density at a 12 mm diameter Pt disc electrode.<sup>S6</sup> Images adapted from reference <sup>S6</sup> with permission from Elsevier, copyright 2001.

**Fig S6a** shows the effect of ultrasound for biphasic Kolbe coupling processes. A considerable current increase in the presence of ultrasound is clearly visible. Under sono-emulsion conditions, there is enough electrode surface to enable the redox process. **Fig S6b** plots the decane yield in the presence of ultrasound reaching 75%.

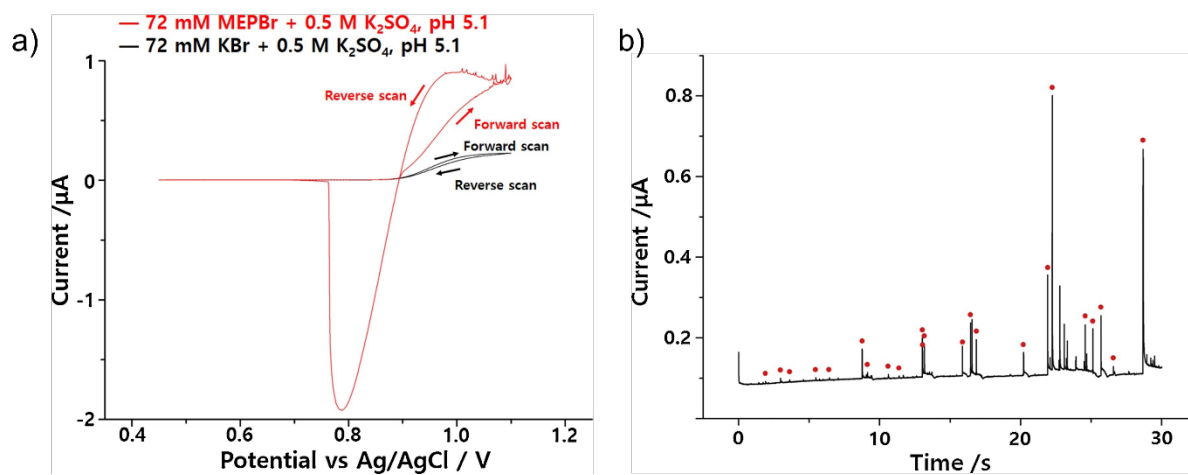

**Fig S7.** (a) CV plots of 72 mM MEPBr + 0.5 M K<sub>2</sub>SO<sub>4</sub> at pH 5.1 (red line) and 72 mM KBr + 0.5 M K<sub>2</sub>SO<sub>4</sub> solution at pH 5.1 (black line). (b) CA plots for a Pt UME showing the droplets' collision time with the electrode.<sup>57</sup> Images adapted from reference <sup>57</sup> with permission from Elsevier, copyright 2017.

**Fig S7a** shows that MEPBr<sup>+</sup> starts oxidation at ca. 0.85 V and reaches a diffusion-controlled state at >1.0 V, with a much larger current than in aqueous KBr. A reduction peak at ca. 0.8 V is observed that corresponds to the reduction of Br<sup>3-</sup> in the droplets adsorbed on the electrode. **Fig S7b** indicates the droplets' collision time with the electrode along with an increased current due to a higher concentration of Br<sup>-</sup> after collision.



## References

- S1. B. De Oliveira and R. Bertazzoli, *J. Electroanal. Chem.*, 2007, **611**, 126.
- S2. H. Kronberger, K. Bruckner and C. Fabjan, *J. Power Sources*, 2000, **86**, 562.
- S3. P. Chambrion, L. Roger, J. Lessard, V. Beraud, J. Mailhot and M. Thomalla, *Can. J. Chem.*, 1995, **73**, 804.
- S4. T. Harhues, M. Padligur, F. Betram, D. M. Roth, J. Linkhorst, A. Jupke, M. Wessling and R. Keller, *ACS Sust. Chem. Eng.*, 2023, **11**, 8413.
- S5. S. A. Pandit, S. A. Bhat, M. A. Rather, F. A. Sofi, P. P. Ingole, Z. M. Bhat, M. O. Thotiyl, K. A. Bhat, S. U. Rehman and M. A. Bhat, *Green Chem.*, 2021, **23**, 9992.
- S6. J. D. Wadhawan, F. J. Del Campo, R. G. Compton, J. S. Foord, F. Marken, S. D. Bull, S. G. Davies, D. J. Walton and S. Ryley, *J. Electroanal. Chem.*, 2001, **507**, 135.
- S7. D. H. Han, S. Park, E. J. Kim and T. D. Chung, *Electrochim. Acta*, 2017, **252**, 164.
